# Supplementary material for: Coherent Somatic Mutation in Autoimmune Disease
Source: PubMed Central journal article supplement (PMC4079513; doi:10.1371/journal.pone.0101093), 2014-07-02
Supplement: pone.0101093.s001.pdf [file pone.0101093.s001.pdf]

## Speculative Observations of Gene Function

### Immunological Significance of *NSUN6*

*NSUN6* has a distinctive repeat pattern in two respects. First, two long repeats of roughly equal length are adjacent. Second, the two repeat units are reverse complements. The resulting palindromes have the potential to form cruciform structures [S1], which lead to genetic instability [S2]. While the identity between palindromic segments is relatively low, the sequence remains palindromic when shifted by a multiple of five bases, giving many more opportunities for the formation of cruciform structures.

I queried the UCSC browser database to determine whether there were additional regions in the human genome with similar characteristics, i.e., (a) at least 2kb and at least 50 units in each repeat, (b) inverted orientation with at most 1kb between repeats, and (c) a repeat unit longer than 2bp but shorter than 100bp. Besides *NSUN6*, there are three such regions in the human genome (Table S-1), two of which are located in centromeric regions away from genes. The third example has the same pair of inverted 5bp repeat units as *NSUN6*, and is located on chromosome 2 at a position 11kb upstream of immunoglobulin kappa variable sequence [S3].

**Table S-1. Human reference genome sequence containing pairs of STRs having: (a) at least 2kb and at least 50 units in each repeat, (b) inverted orientation with at most 1kb between repeats, and (c) a repeat unit longer than 2bp but shorter than 100bp.**

| Chrom. | Location | Unit size | Copies | Identity (%) | Sequence     |
|--------|----------|-----------|--------|--------------|--------------|
| 10     | 39076595 | 5         | 7271.6 | 65           | TTCCA        |
| 10     | 39113854 | 5         | 8212.8 | 66           | TGGAA        |
| 2      | 89850110 | 5         | 4789.2 | 68           | TTCCA        |
| 2      | 89874086 | 5         | 1178.4 | 73           | TGGAA        |
| 10     | 18842234 | 5         | 1830.4 | 67           | TGGAA        |
| 10     | 18852502 | 5         | 1770.8 | 67           | TTCCA        |
| 22     | 16565087 | 48        | 82.9   | 75           | GGGACAAAC... |
| 22     | 16569067 | 48        | 68.6   | 73           | GTTTGTCCC... |

*NSUN6* encodes a putative methyltransferase with unknown function. Curiously, the repeat in *NSUN6* is about 11kb away from the adjacent gene *CACNB2*. *CACNB2* encodes an autoantigen in Lambert-Eaton myasthenic syndrome [S4] and a susceptibility locus for several mental disorders [S5].

### *GALNT9*

The *GALNT9* gene contains a 7.7kb repeat with 94% identity (Figure 1). *GALNT9* encodes a protein responsible for O-glycosylation, with expression primarily in specific areas of the brain [S6], although expression in B cells [S7] has been reported. Toba et al [S6]. speculate that *GALNT9* may be involved in the O-glycosylation of tenascin-R (TNR) and beta-amyloid precursor protein (APP). If so, then somatic mutation at *GALNT9* could influence processes that depend on the O-glycosylation of these proteins.

O-glycosylated TNR is a ligand for MAG [S8,S9], and is involved in myelination [S10]. Disruption of O-glycosylated TNR could be relevant to multiple sclerosis and other demyelinating diseases.

The maturation of APP involves the addition of several short O-glycans [S11]. O-glycosylation is an important step during APP cleavage [S12], and influences amyloid beta processing [S13]. Dysregulated O-glycosylation could be relevant to Alzheimer's disease, in which amyloid plaques are the central disease feature.

### ***CLEC17A***

The *CLEC17A* gene interacts with *BLNK*, a gene essential for B-cell receptor (BCR) signaling [S14]. *CLEC17A* appears to be responsible for recruitment of BLNK to the cell membrane [S14]. Somatic mutations to *CLEC17A* could alter the BCR signaling pathway in some B cells. If those B cells are autoreactive and selectively undergo expansion, autoimmunity could result.

### **Myelination Genes**

Besides *MAG*, several other myelination-related genes have long tandem repeats or high repeat counts. *TRPM3* is a calcium-channel protein in oligodendrocytes that participates in central nervous system myelination [S15]; calcium channel perturbation is associated with MS [S16]. *GRM4* dampens the immune response in mouse models of multiple sclerosis [S17]. *MAL* is involved in myelination in both the central and peripheral nervous systems [S18].

### **Ankylosing Spondylitis**

While there is no strong evidence of specific autoantibodies in AS [S19] the *ACAN* gene is an interesting candidate because it is a T cell immune target in AS [S20]. *ACAN* has a 1.8kb coding minisatellite that influences lumbar degenerative disc disease [S21].

### **Parkinson's Disease**

Parkinson's disease (PD) is linked with inflammation and autoimmunity [S22–S24]. Two genes with potential relevance to PD are *RILPL1* (1519 repeat units) and *PARK2* (741 repeat units). *RILPL1* is neuroprotective via binding to GAPDH [S25]; deprenyl, a PD drug, also binds to GAPDH to prevent death cascade induction [S26]. Mutations and copy number variants in *PARK2* [S27, S28], aberrant *PARK2* splicing [S29], and reduced *PARK2* expression [S30] are associated with PD. Another candidate gene is *SNCAIP*, a gene associated with Parkinson's disease, that is regularly somatically duplicated in medulloblastoma [S31].

### **Amyotrophic Lateral Sclerosis**

Amyotrophic Lateral Sclerosis (ALS) also has links to inflammation and autoimmunity [S32–S34]. A gene with potential relevance to ALS is *VPS53*, which contains a long (8683bp) tandem repeat. *VPS53* encodes a subunit of the GARP complex [S35], and mutations in another GARP complex gene (*VPS54*) cause the wobbler mouse phenotype, reminiscent of ALS, with reduced *VPS53* expression [S36].

### **Germ-Line Variation at STR Loci**

Repetitive sequence is a marker of germ-line variability [S37, S38]; actual variability can be verified by consulting data on structural variation. Wong et al. [S39] utilize high coverage data of 96 individuals to obtain genomewide data about structural variation in the Malay population. The high coverage (30X) data allowed roughly twice as many deletion variants to be detected as a low coverage (5X) version of the

data [S39]. When an STR locus exhibits structural variation within the STR boundaries, “internal” germ-line variation is apparent. Structural variation that spans an STR locus is termed “external” variation. Any reported difference from the reference sequence is considered variation. Only differences exceeding 50bp were reported by Wong et al. [S39].

**Table S-2. Germ-line variability according to Wong et al. [S39] at each of the STR loci of Figure 1.** The *NBPF* family of genes and several additional genes show only external variation; these STRs occur in regions of complex segmental duplications that induce larger-scale structural variation. Only *MAGEA4* and *ERC1* show no variation at all.

| Gene                 | Length | Internal<br>Variation | External<br>Variation |
|----------------------|--------|-----------------------|-----------------------|
| <i>NBPF20</i>        | 75756  |                       | Y                     |
| <i>NBPF10</i>        | 56130  |                       | Y*                    |
| <i>TTC34</i>         | 52937  | Y                     |                       |
| <i>ANKRD36C</i>      | 49539  | Y                     | Y*                    |
| <i>NBPF12</i>        | 44470  |                       | Y*                    |
| <i>ANKRD36</i>       | 39925  | Y                     | Y*                    |
| <i>TPO</i>           | 15472  | Y                     |                       |
| <i>PTPRN2</i>        | 12668  | Y                     |                       |
| <i>AHNAK2</i>        | 11843  | Y                     |                       |
| <i>BRF1</i>          | 11321  | Y                     |                       |
| <i>FLG</i>           | 10828  | Y                     |                       |
| <i>NBPF14</i>        | 10798  |                       | Y                     |
| <i>ABCG8</i>         | 10788  | Y                     |                       |
| <i>MUC17</i>         | 10659  | Y                     | Y                     |
| <i>NSUN6</i>         | 10260  | Y                     |                       |
| <i>NSUN6</i>         | 9943   |                       |                       |
| <i>MUC4</i>          | 9813   | Y                     |                       |
| <i>TTC34</i>         | 8941   | Y                     |                       |
| <i>VPS53</i>         | 8683   | Y                     |                       |
| <i>IL3RA</i>         | 8509   | Y                     | Y                     |
| <i>SNTG2</i>         | 8384   | Y                     |                       |
| <i>HRNR</i>          | 7794   | Y                     |                       |
| <i>GALNT9</i>        | 7757   | Y                     |                       |
| <i>USP41,FAM230A</i> | 7516   | Y                     |                       |
| <i>ROBO2</i>         | 7169   | Y                     |                       |
| <i>SPDYE3</i>        | 7020   |                       | Y                     |
| <i>MAGEA4</i>        | 6627   |                       |                       |
| <i>SLC1A7</i>        | 6572   | Y                     |                       |
| <i>FAM198A</i>       | 6551   | Y                     |                       |
| <i>PLEKHB2</i>       | 6521   |                       | Y                     |
| <i>ANKRD36C</i>      | 6410   |                       | Y*                    |
| <i>CACNG7</i>        | 6321   |                       | Y*                    |
| <i>FAM182B</i>       | 6292   | Y                     | Y                     |
| <i>ERC1</i>          | 5898   |                       |                       |
| <i>ASMT</i>          | 5826   | Y                     |                       |
| <i>DHR SX</i>        | 5644   | Y                     |                       |
| <i>ZNF717</i>        | 5139   | Y                     |                       |

\*These variants were uniform within the population studied by Wong et al. [S39] but different from the reference sequence. All remaining loci exhibited multiple alleles in the population.

**Table S-3. Germ-line variability according to Wong et al. [S39] at each of the STR loci of Figure 3.** A minority of the genes, mostly those with the highest repeat counts, show germ-line STR variability.

| Gene            | Repeat Count | Internal Variation | External Variation |
|-----------------|--------------|--------------------|--------------------|
| <i>MGAM</i>     | 2296.5       | Y                  |                    |
| <i>TTC40</i>    | 2062.5       | Y                  |                    |
| <i>RILPL1</i>   | 1519         | Y                  |                    |
| <i>ANKDD1A</i>  | 1277.3       |                    |                    |
| <i>GRM4</i>     | 1151.5       | Y                  |                    |
| <i>MRPS22</i>   | 1135         |                    |                    |
| <i>PLXNA4</i>   | 1048.7       | Y                  |                    |
| <i>MUSK</i>     | 1003.5       |                    |                    |
| <i>MAG</i>      | 997          |                    |                    |
| <i>TP53TG3C</i> | 945.5        |                    | Y*                 |
| <i>ATP8B4</i>   | 891          |                    |                    |
| <i>C4orf22</i>  | 880.5        |                    |                    |
| <i>MYO16</i>    | 862          |                    |                    |
| <i>RTN1</i>     | 849.5        |                    |                    |
| <i>ASMTL</i>    | 844.2        | Y                  | Y                  |
| <i>SHOX</i>     | 834.5        | Y                  |                    |
| <i>SLC9A9</i>   | 826.5        |                    |                    |
| <i>TWIST2</i>   | 814.5        |                    |                    |
| <i>COL22A1</i>  | 807          | Y                  |                    |
| <i>IQCA1</i>    | 796          |                    |                    |
| <i>MAL</i>      | 786.4        |                    |                    |
| <i>STK32B</i>   | 785          |                    |                    |
| <i>COL5A1</i>   | 763.5        |                    | Y*                 |
| <i>BCL2</i>     | 752          |                    |                    |
| <i>DCC</i>      | 750          |                    |                    |
| <i>PARK2</i>    | 741.5        |                    |                    |
| <i>ZFPM1</i>    | 715.5        |                    |                    |
| <i>ADAMTS3</i>  | 713          |                    |                    |
| <i>XXYLT1</i>   | 707.5        |                    |                    |

\*These variants were uniform within the population studied by Wong et al. [S39] but different from the reference sequence. All remaining loci exhibited multiple alleles in the population.

**Table S-4. Germ-line variability according to Wong et al. [S39] at each of the STR loci of Table 3.** While structural variation at *PGA4* is not observed in the population studied by Wong et al. [S39], extensive structural variation is observed at *PGA4* in other populations [S40]. Similarly, structural variation around the STR in *TTN* has been observed in other populations (e.g., [S41]).

| Gene                   | Length | Internal<br>Variation | External<br>Variation |
|------------------------|--------|-----------------------|-----------------------|
| <i>NBPF20</i>          | 76181  |                       | Y                     |
| <i>NBPF8</i>           | 65137  |                       |                       |
| <i>CR1</i>             | 54708  |                       | Y                     |
| <i>ANKRD30A</i>        | 47663  |                       | Y                     |
| <i>RBMV1A1</i>         | 47081  |                       |                       |
| <i>NBPF12</i>          | 44119  |                       | Y                     |
| <i>PGA4</i>            | 37662  |                       |                       |
| <i>TRPM3</i>           | 35986  |                       |                       |
| <i>FCGBP</i>           | 31945  | Y                     |                       |
| <i>NEB</i>             | 31782  |                       |                       |
| <i>NKG2-E</i>          | 30864  | Y                     |                       |
| <i>TBC1D3C/TBC1D3H</i> | 27063  |                       |                       |
| <i>HCAR1</i>           | 26136  | Y                     |                       |
| <i>TTC34</i>           | 22675  | Y                     | Y                     |
| <i>DAZ1</i>            | 21690  |                       |                       |
| <i>NBPF1</i>           | 12620  |                       | Y                     |
| <i>NBPF12</i>          | 12568  |                       | Y*                    |
| <i>BRF1</i>            | 11321  | Y                     |                       |
| <i>C2orf78</i>         | 10103  |                       |                       |
| <i>CLEC17A</i>         | 8924   | Y                     |                       |
| <i>TTN</i>             | 8521   |                       |                       |
| <i>SNTG2</i>           | 8383   | Y                     |                       |
| <i>IFI16</i>           | 8282   | Y                     |                       |
| <i>MUC5B</i>           | 7627   |                       | Y*                    |
| <i>SPDYE3</i>          | 7020   |                       | Y                     |
| <i>ERC1</i>            | 5850   |                       |                       |
| <i>HRNR</i>            | 5637   | Y                     |                       |
| <i>ACRC</i>            | 4289   | Y                     |                       |
| <i>SPRN</i>            | 4144   |                       |                       |
| <i>TMEM132D</i>        | 3907   |                       |                       |
| <i>HP/HPR</i>          | 3431   |                       | Y                     |

\*These variants were uniform within the population studied by Wong et al. [S39] but different from the reference sequence. All remaining loci exhibited multiple alleles in the population.

**Table S-5. Internally variable STRs within long (>5kb) regions of self-alignment within protein-coding genes (Table 4) according to Wong et al. [S39].** Unlike Table S-2, internal variation is found in *NBPF10*, *ERC1* and *MAGEA4*. The self-chain boundaries are more permissive, allowing for gaps in the alignment. While variation within the STR in the *LPA* gene is absent for the population of Wong et al. [S39], structural variation within the *LPA* STR has been observed in other populations (e.g., [S41, S42]).

| Gene            | Length |
|-----------------|--------|
| <i>NBPF10</i>   | 45133  |
| <i>FCGBP</i>    | 30167  |
| <i>DMBT1</i>    | 26579  |
| <i>MGAM</i>     | 24595  |
| <i>KIR3DL1</i>  | 22943  |
| <i>ANKRD30B</i> | 18603  |
| <i>KATNAL2</i>  | 13368  |
| <i>HCAR1</i>    | 12648  |
| <i>POTEJ</i>    | 12480  |
| <i>MTUS2</i>    | 10090  |
| <i>ANKRD36</i>  | 8739   |
| <i>PTPRN2</i>   | 8649   |
| <i>TTC34</i>    | 8343   |
| <i>FLG</i>      | 7934   |
| <i>BRF1</i>     | 7650   |
| <i>ST3GAL4</i>  | 6583   |
| <i>MUC12</i>    | 6346   |
| <i>GALNT9</i>   | 6290   |
| <i>TRHDE</i>    | 6161   |
| <i>ERC1</i>     | 5794   |
| <i>ROBO2</i>    | 5789   |
| <i>TM4SF2</i>   | 5498   |
| <i>CACNG7</i>   | 5304   |
| <i>SNTG2</i>    | 5229   |
| <i>MAGEA4</i>   | 5091   |
| <i>ASMT</i>     | 5021   |

## SQL Queries

---

**Query 1** GENCODE V17 protein-coding genes containing long ( $\geq 1000$ bp) repeats as applied to the hg19 dataset in the UCSC MySQL database. To rank by repeat length, the phrase `order by length desc` can be appended; to rank by repeat frequency, the phrase `order by copyNum desc` can be appended.

---

```
select distinct g.name2, s.*
from (select *, chromEnd-chromStart as length
      from simpleRepeat
      where chromEnd-chromStart>=1000) s,
      wgEncodeGencodeBasicV17 g,
      wgEncodeGencodeAttrsV17 a
where g.chrom=s.chrom and g.txStart<s.chromEnd
      and g.txEnd> s.chromStart and
      a.transcriptId=g.name and a.transcriptType='protein_coding'
```

---

---

**Query 2** RefSeq protein-coding genes containing long ( $\geq 1000$ bp) repeats as applied to the hg19 dataset in the UCSC MySQL database. The “NM” prefix indicates a protein-coding gene [S43].

---

```
select distinct g.name2, s.*
from (select *, chromEnd-chromStart as length
      from simpleRepeat
      where chromEnd-chromStart>=1000) s,
      refGene g
where g.chrom=s.chrom and g.txStart<s.chromEnd
      and g.txEnd> s.chromStart and
      g.name like 'NM%';
```

---

---

**Query 3** Long tandem segmental duplications within GENCODE V17 protein-coding genes.

---

```
select distinct g.name2, otherStart-chromEnd as gap,
               chromEnd-chromStart+otherEnd-otherStart as totlen,
from (select *
      from genomicSuperDups
      where chrom=otherChrom and
            otherStart+1 between chromStart and chromEnd+101
            and fracMatch>=0.96 and strand="+") s,
      wgEncodeGencodeBasicV17 g,
      wgEncodeGencodeAttrsV17 a
where s.chrom = g.chrom and
      (((g.txStart<s.chromStart and g.txEnd>s.chromStart) and
        (g.txStart<s.chromEnd and g.txEnd>s.chromEnd)) or
        ((g.txStart<s.otherStart and g.txEnd>s.otherStart) and
          (g.txStart<s.otherEnd and g.txEnd>s.otherEnd))) and
      chromEnd-chromStart+otherEnd-otherStart > 3400 and
      a.transcriptId=g.name and a.transcriptType='protein_coding'
order by chromEnd-chromStart+otherEnd-otherStart desc;
```

---

---

**Query 4** Query used to identify long self-alignments within GENCODE V17 protein-coding genes.

---

```
select g.name2, g.chrom, max(f.matchLen)
from (select *, score/normscore as matchLen
      from chainSelf
      where tEnd-tStart>=5000 and qstrand="+
            and normscore >=60) f,
      wgEncodeGencodeBasicV17 g,
      wgEncodeGencodeAttrsV17 a
where g.chrom=f.tName and g.chrom=f.qName and g.txStart<f.tStart
      and g.txEnd>f.tEnd and g.txStart<f.qStart and g.txEnd>f.qEnd
      and a.transcriptId=g.name and a.transcriptType='protein_coding'
group by g.name2, g.chrom
having max(f.matchLen) > 5000
order by max(matchLen) desc;
```

---



---

**Query 5** Query used to identify long tandem repeats (at least 1000bp) within introns of GENCODE V17 protein-coding genes. The intermediate query n contains all integers between 1 and 363 and is abbreviated below; the number 363 is the number of exons in the GENCODE transcript with the most exons.

---

```

select t.*, t.intronEnd-t.intronStart+1 as IntronLen,
       s.chromEnd-s.chromStart+1 as ReptLen,
       (1.0*s.chromEnd-s.chromStart+1)/(t.intronEnd-t.intronStart+1)
       as Occupancy
from (select distinct g.name2, g.chrom,
    CAST(REPLACE(SUBSTRING(SUBSTRING_INDEX(exonEnds,',',n.i),
        LENGTH(SUBSTRING_INDEX(exonEnds,',',n.i-1)) + 1),',', '' )
        as UNSIGNED INTEGER) +1 as intronStart,
    CAST(REPLACE(SUBSTRING(SUBSTRING_INDEX(exonStarts,',',n.i+1),
        LENGTH(SUBSTRING_INDEX(exonStarts,',',n.i)) + 1),',', '' )
        as UNSIGNED INTEGER) -1 as intronEnd
from wgEncodeGencodeBasicV17 g, wgEncodeGencodeAttrsV17 a,
    ( select 1 as i union all
      select 2 union all
      ...
      select 363 ) n
where a.transcriptId=g.name
      and a.transcriptType='protein_coding'
      and n.i < g.exonCount ) t,
(select *
from simpleRepeat
where chromEnd-chromStart>1000 ) s
where t.chrom=s.chrom and t.intronStart <= s.chromStart
      and t.intronEnd >= s.chromEnd
order by (1.0*s.chromEnd-s.chromStart+1)/(t.intronEnd-t.intronStart+1)
desc;

```

---

**Query 6** Query used to identify long tandem repeats in the mouse (mm10).

---

```

select distinct g.name2, length, s.period
from (select *, chromEnd-chromStart+1 as length
from simpleRepeat
where chromEnd-chromStart>=1000) s,
refGene g
where g.name like 'NM%' and g.chrom=s.chrom and (
    (g.strand='+' and g.txStart-5000<s.chromEnd
      and g.txEnd> s.chromStart)
or
    (g.strand='-' and g.txStart<s.chromEnd
      and g.txEnd+5000> s.chromStart))
order by length desc;

```

---

---

**Query 7** Query used to identify palindromic pairs of long tandem repeats.

---

```
select s.chrom, s.chromStart, s.chromEnd,
       s.period, s.copyNum, s.perMatch,
       s.length, s.sequence, t.chromStart,
       t.chromEnd, t.period, t.copyNum,
       t.perMatch, t.length, t.sequence
from (select *, chromEnd-chromStart as length
      from simpleRepeat
      where copynum>50 and chromEnd-chromStart>2000
        and period<100) s,
     (select *, chromEnd-chromStart as length
      from simpleRepeat
      where copynum>50 and chromEnd-chromStart>2000
        and period<100) t
where t.chrom=s.chrom and t.period=s.period
      and t.chromStart between s.chromEnd and s.chromEnd+1000
order by s.period asc, s.length desc;
```

---

---

**Query 8** Query used to identify internal structural variation at STR loci using the data from Wong et al. [S39], whose PubMed identifier is "23290073".

---

```
select p.name2, p.chromStart, p.chromEnd,
       p.length, p.copyNum, p.perMatch, p.period,
       sum(sampleSize) as samples,
       sum(observedGains) as gains,
       sum(observedLosses) as losses,
       count(*) as cnt
from (select distinct g.name2, s.*
      from (select *, chromEnd-chromStart as length
            from simpleRepeat
            where chromEnd-chromStart>=1000) s,
           wgEncodeGencodeBasicV17 g,
           wgEncodeGencodeAttrsV17 a
      where g.chrom=s.chrom and g.txStart<s.chromEnd
            and g.txEnd> s.chromStart and a.transcriptId=g.name
            and a.transcriptType='protein_coding') p,
     dgvMerged d
where d.pubMedId="23290073" and d.chrom=p.chrom
      and d.chromStart>p.chromStart and d.chromEnd<p.chromEnd
group by p.name2, p.chromStart, p.chromEnd, p.length, p.copyNum, p.perMatch, p.period
```

---

---

**Query 9** Query used to identify external structural variation at STR loci using the data from Wong et al. [S39].

---

```
select p.name2, p.chromStart, p.chromEnd,
       p.length, p.copyNum, p.perMatch, p.period,
       sum(sampleSize) as samples,
       sum(observedGains) as gains,
       sum(observedLosses) as losses,
       count(*) as cnt
from (select distinct g.name2, s.*
      from (select *, chromEnd-chromStart as length
            from simpleRepeat
            where chromEnd-chromStart>=1000) s,
      wgEncodeGencodeBasicV17 g,
      wgEncodeGencodeAttrsV17 a
      where g.chrom=s.chrom and g.txStart<s.chromEnd
            and g.txEnd> s.chromStart and a.transcriptId=g.name
            and a.transcriptType='protein_coding') p,
      dgvMerged d
where d.pubMedId="23290073" and d.chrom=p.chrom
      and d.chromStart<p.chromStart and d.chromEnd>p.chromEnd
group by p.name2, p.chromStart, p.chromEnd, p.length, p.copyNum, p.perMatch, p.period
```

---

---

**Query 10** Query used to identify internal structural variation at long tandem repeat loci (Table 3) using the data from Wong et al. [S39].

---

```
select p.name2, p.chromStart, p.chromEnd, length, sum(sampleSize) as samples,
       sum(observedGains) as gains, sum(observedLosses) as losses, count(*) as cnt
from (select distinct g.name2, s.*
      from (select *, cast(chromEnd as signed integer)
              -cast(chromStart as signed integer)
              +cast(otherEnd as signed integer)
              -cast(otherStart as signed integer) as length
            from genomicSuperDups
            where chrom=otherChrom and otherStart+1 between chromStart and chromEnd+101
            and fracMatch>=0.96 and strand="+" and
            cast(chromEnd as signed integer)
            -cast(chromStart as signed integer)
            +cast(otherEnd as signed integer)
            -cast(otherStart as signed integer) > 2000) s,
      wgEncodeGencodeBasicV17 g, wgEncodeGencodeAttrsV17 a
      where g.chrom=s.chrom and
            (((g.txStart<s.chromStart and g.txEnd>s.chromStart) and
              (g.txStart<s.chromEnd and g.txEnd>s.chromEnd)) or
              ((g.txStart<s.otherStart and g.txEnd>s.otherStart) and
              (g.txStart<s.otherEnd and g.txEnd>s.otherEnd)))
            and a.transcriptId=g.name and a.transcriptType='protein_coding') p,
      dgvMerged d
      where d.pubMedId="23290073" and d.chrom=p.chrom and
            d.chromStart>p.chromStart and d.chromEnd<p.otherEnd
      group by p.name2, p.chromStart, p.chromEnd, p.length
      order by length desc;
```

---

---

**Query 11** Query used to identify external structural variation at long tandem repeat loci (Table 3) using the data from Wong et al. [S39].

---

```
select p.name2, p.chromStart, p.chromEnd, length, sum(sampleSize) as samples,
       sum(observedGains) as gains, sum(observedLosses) as losses, count(*) as cnt
from (select distinct g.name2, s.*
      from (select *, cast(chromEnd as signed integer)
              -cast(chromStart as signed integer)
              +cast(otherEnd as signed integer)
              -cast(otherStart as signed integer) as length
            from genomicSuperDups
            where chrom=otherChrom and otherStart+1 between chromStart and chromEnd+101
            and fracMatch>=0.96 and strand="+" and
            cast(chromEnd as signed integer)
            -cast(chromStart as signed integer)
            +cast(otherEnd as signed integer)
            -cast(otherStart as signed integer) > 2000) s,
            wgEncodeGencodeBasicV17 g, wgEncodeGencodeAttrsV17 a
      where g.chrom=s.chrom and
            (((g.txStart<s.chromStart and g.txEnd>s.chromStart) and
              (g.txStart<s.chromEnd and g.txEnd>s.chromEnd)) or
              ((g.txStart<s.otherStart and g.txEnd>s.otherStart) and
              (g.txStart<s.otherEnd and g.txEnd>s.otherEnd)))
            and a.transcriptId=g.name and a.transcriptType='protein_coding') p,
      dgvMerged d
where d.pubMedId="23290073" and d.chrom=p.chrom and
      d.chromStart<p.chromStart and d.chromEnd>p.otherEnd
group by p.name2, p.chromStart, p.chromEnd, p.length
order by length desc;
```

---

---

**Query 12** Query used to identify internal structural variation at Self-chain loci (Table 4) using the data from Wong et al. [S39].

---

```
select p.name2, p.length, p.length2, matchlen, sum(sampleSize) as samples,
       sum(observedGains) as gains, sum(observedLosses) as losses, count(*) as cnt
from (select distinct g.name2, g.chrom, s.*
      from (select *, tEnd-tStart as length, qEnd-qStart as length2,
                  score/normscore as matchLen
            from chainSelf
            where tEnd-tStart>=5000 and qstrand="+" and normscore >=60 and tName=qName) s,
          wgEncodeGencodeBasicV17 g, wgEncodeGencodeAttrsV17 a
      where g.chrom=s.tName and g.txStart<s.tStart and g.txEnd> s.tEnd
            and g.txStart<s.qStart and g.txEnd> s.qEnd
            and a.transcriptId=g.name and a.transcriptType='protein_coding') p,
      dgvMerged d
where d.pubMedId="23290073" and d.chrom=p.chrom and
      ((d.chromStart>p.tStart or d.chromStart>p.qStart)
       and (d.chromEnd<p.tEnd or d.chromEnd<p.qEnd ))
group by p.name2, p.length, p.length2, matchlen
order by matchlen desc;
```

---

## References

- [S1] Bacolla A, Wells RD (2004) Non-B DNA conformations, genomic rearrangements, and human disease. *J Biol Chem* 279: 47411–47414.
- [S2] Lobachev KS, Rattray A, Narayanan V (2007) Hairpin- and cruciform-mediated chromosome breakage: causes and consequences in eukaryotic cells. *Front Biosci* 12: 4208–4220.
- [S3] Klein R, Jaenichen R, Zachau HG (1993) Expressed human immunoglobulin kappa genes and their hypermutation. *Eur J Immunol* 23: 3248–3262.
- [S4] Rosenfeld MR, Wong E, Dalmau J, Manley G, Posner JB, et al. (1993) Cloning and characterization of a Lambert-Eaton myasthenic syndrome antigen. *Ann Neurol* 33: 113–120.
- [S5] Smoller JW, Craddock N, Kendler K, Lee PH, Neale BM, et al. (2013) Identification of risk loci with shared effects on five major psychiatric disorders: a genome-wide analysis. *Lancet* 381: 1371–1379.
- [S6] Toba S, Tenno M, Konishi M, Mikami T, Itoh N, et al. (2000) Brain-specific expression of a novel human UDP-GalNAc:polypeptide N-acetylgalactosaminyltransferase (GalNAc-T9). *Biochim Biophys Acta* 1493: 264–268.
- [S7] Iwasaki H, Zhang Y, Tachibana K, Gotoh M, Kikuchi N, et al. (2003) Initiation of O-glycan synthesis in IgA1 hinge region is determined by a single enzyme, UDP-N-acetyl-alpha-D-galactosamine:polypeptide N-acetylgalactosaminyltransferase 2. *J Biol Chem* 278: 5613–5621.
- [S8] Zamze S, Harvey DJ, Pesheva P, Mattu TS, Schachner M, et al. (1999) Glycosylation of a CNS-specific extracellular matrix glycoprotein, tenascin-R, is dominated by O-linked sialylated glycans and "brain-type" neutral N-glycans. *Glycobiology* 9: 823–831.
- [S9] Yang H, Xiao ZC, Becker B, Hillenbrand R, Rougon G, et al. (1999) Role for myelin-associated glycoprotein as a functional tenascin-R receptor. *J Neurosci Res* 55: 687–701.
- [S10] Bartsch U, Pesheva P, Raff M, Schachner M (1993) Expression of janusin (J1-160/180) in the retina and optic nerve of the developing and adult mouse. *Glia* 9: 57–69.
- [S11] Pahlsson P, Spitalnik SL (1996) The role of glycosylation in synthesis and secretion of beta-amyloid precursor protein by Chinese hamster ovary cells. *Arch Biochem Biophys* 331: 177–186.
- [S12] Tomita S, Kirino Y, Suzuki T (1998) Cleavage of Alzheimer's amyloid precursor protein (APP) by secretases occurs after O-glycosylation of APP in the protein secretory pathway. Identification of intracellular compartments in which APP cleavage occurs without using toxic agents that interfere with protein metabolism. *J Biol Chem* 273: 6277–6284.
- [S13] Kitazume S, Tachida Y, Kato M, Yamaguchi Y, Honda T, et al. (2010) Brain endothelial cells produce amyloid beta from amyloid precursor protein 770 and preferentially secrete the O-glycosylated form. *J Biol Chem* 285: 40097–40103.
- [S14] Oellerich T, Bremes V, Neumann K, Bohnenberger H, Dittmann K, et al. (2011) The B-cell antigen receptor signals through a preformed transducer module of SLP65 and CIN85. *EMBO J* 30: 3620–3634.
- [S15] Hoffmann A, Grimm C, Kraft R, Goldbaum O, Wrede A, et al. (2010) TRPM3 is expressed in sphingosine-responsive myelinating oligodendrocytes. *J Neurochem* 114: 654–665.
- [S16] Soliven B (2001) Calcium signalling in cells of oligodendroglial lineage. *Microsc Res Tech* 52: 672–679.

- [S17] Fallarino F, Volpi C, Fazio F, Notartomaso S, Vacca C, et al. (2010) Metabotropic glutamate receptor-4 modulates adaptive immunity and restrains neuroinflammation. *Nat Med* 16: 897–902.
- [S18] Frank M, Schaeren-Wiemers N, Schneider R, Schwab ME (1999) Developmental expression pattern of the myelin proteolipid MAL indicates different functions of MAL for immature Schwann cells and in a late step of CNS myelinogenesis. *J Neurochem* 73: 587–597.
- [S19] Wright C, Sibani S, Trudgian D, Fischer R, Kessler B, et al. (2012) Detection of multiple autoantibodies in patients with ankylosing spondylitis using nucleic acid programmable protein arrays. *Mol Cell Proteomics* 11: M9.00384.
- [S20] Zou J, Zhang Y, Thiel A, Rudwaleit M, Shi SL, et al. (2003) Predominant cellular immune response to the cartilage autoantigenic G1 aggrecan in ankylosing spondylitis and rheumatoid arthritis. *Rheumatology (Oxford)* 42: 846–855.
- [S21] Kawaguchi Y, Osada R, Kanamori M, Ishihara H, Ohmori K, et al. (1999) Association between an aggrecan gene polymorphism and lumbar disc degeneration. *Spine* 24: 2456–2460.
- [S22] Koutsilieri E, Lutz MB, Scheller C (2013) Autoimmunity, dendritic cells and relevance for Parkinson’s disease. *J Neural Transm* 120: 75–81.
- [S23] Monahan AJ, Warren M, Carvey PM (2008) Neuroinflammation and peripheral immune infiltration in Parkinson’s disease: an autoimmune hypothesis. *Cell Transplant* 17: 363–372.
- [S24] Nolan YM, Sullivan AM, Toulouse A (2013) Parkinson’s disease in the nuclear age of neuroinflammation. *Trends Mol Med* 19: 187–196.
- [S25] Sen N, Hara MR, Ahmad AS, Cascio MB, Kamiya A, et al. (2009) GOSPEL: a neuroprotective protein that binds to GAPDH upon S-nitrosylation. *Neuron* 63: 81–91.
- [S26] Hara MR, Thomas B, Cascio MB, Bae BI, Hester LD, et al. (2006) Neuroprotection by pharmacologic blockade of the GAPDH death cascade. *Proc Natl Acad Sci USA* 103: 3887–3889.
- [S27] Houlden H, Singleton AB (2012) The genetics and neuropathology of Parkinson’s disease. *Acta Neuropathol* 124: 325–338.
- [S28] Wang L, Nuytemans K, Bademci G, Jauregui C, Martin ER, et al. (2013) High-resolution survey in familial Parkinson disease genes reveals multiple independent copy number variation events in PARK2. *Hum Mutat* 34: 1071–1074.
- [S29] Tan EK, Shen H, Tan JM, Lim KL, Fook-Chong S, et al. (2005) Differential expression of splice variant and wild-type parkin in sporadic Parkinson’s disease. *Neurogenetics* 6: 179–184.
- [S30] Chung JY, Park HR, Lee SJ, Lee SH, Kim JS, et al. (2013) Elevated TRAF2/6 expression in Parkinson’s disease is caused by the loss of Parkin E3 ligase activity. *Lab Invest* 93: 663–676.
- [S31] Northcott PA, Shih DJ, Peacock J, Garzia L, Morrissy AS, et al. (2012) Subgroup-specific structural variation across 1,000 medulloblastoma genomes. *Nature* 488: 49–56.
- [S32] Pagani MR, Gonzalez LE, Uchitel OD (2011) Autoimmunity in amyotrophic lateral sclerosis: past and present. *Neurol Res Int* 2011: 497080.
- [S33] Fiala M, Chattopadhyay M, La Cava A, Tse E, Liu G, et al. (2010) IL-17A is increased in the serum and in spinal cord CD8 and mast cells of ALS patients. *J Neuroinflammation* 7: 76.



- [S34] Hemminki K, Li X, Sundquist J, Sundquist K (2009) Familial risks for amyotrophic lateral sclerosis and autoimmune diseases. *Neurogenetics* 10: 111–116.
- [S35] Bonifacino JS, Hierro A (2011) Transport according to GARP: receiving retrograde cargo at the trans-Golgi network. *Trends Cell Biol* 21: 159–167.
- [S36] Perez-Victoria FJ, Abascal-Palacios G, Tascon I, Kajava A, Magadan JG, et al. (2010) Structural basis for the wobbler mouse neurodegenerative disorder caused by mutation in the Vps54 subunit of the GARP complex. *Proc Natl Acad Sci USA* 107: 12860–12865.
- [S37] Naslund K, Saetre P, von Salome J, Bergstrom TF, Jareborg N, et al. (2005) Genome-wide prediction of human VNTRs. *Genomics* 85: 24–35.
- [S38] Legendre M, Pochet N, Pak T, Verstrepen KJ (2007) Sequence-based estimation of minisatellite and microsatellite repeat variability. *Genome Res* 17: 1787–1796.
- [S39] Wong LP, Ong RT, Poh WT, Liu X, Chen P, et al. (2013) Deep whole-genome sequencing of 100 southeast Asian Malays. *Am J Hum Genet* 92: 52–66.
- [S40] Taggart RT, Samloff IM, Raffel LJ, Graham A, Cass C, et al. (1986) Relationships between the human pepsinogen DNA and protein polymorphisms. *Am J Hum Genet* 38: 848–854.
- [S41] Conrad DF, Pinto D, Redon R, Feuk L, Gokcumen O, et al. (2010) Origins and functional impact of copy number variation in the human genome. *Nature* 464: 704–712.
- [S42] Kidd JM, Cooper GM, Donahue WF, Hayden HS, Sampas N, et al. (2008) Mapping and sequencing of structural variation from eight human genomes. *Nature* 453: 56–64.
- [S43] Pruitt KD, Tatusova T, Brown GR, Maglott DR (2012) NCBI Reference Sequences (RefSeq): current status, new features and genome annotation policy. *Nucleic Acids Res* 40: D130–135.
